# Supplementary material
Source: PubMed Central journal article supplement (PMC10021420)
Supplement: pgph.0000285.s006.pdf [file pgph.0000285.s006.pdf]

S1 Table. Demographic characteristics of the study population during each survey.

| Demographic characteristics <sup>a</sup>                         | Pre-IRS                                         |                                                  | Post-IRS                                        |                                                  |
|------------------------------------------------------------------|-------------------------------------------------|--------------------------------------------------|-------------------------------------------------|--------------------------------------------------|
|                                                                  | Survey 1<br>End of wet season<br>(October 2012) | Survey 2<br>End of dry season<br>(May/June 2013) | Survey 3<br>End of wet season<br>(October 2015) | Survey 4<br>End of dry season<br>(May/June 2016) |
| <b>Age groups<sup>b</sup></b>                                    |                                                 |                                                  |                                                 |                                                  |
| All                                                              | 1923                                            | 1902                                             | 2022                                            | 2091                                             |
| 1-5 years                                                        | 356 (18.5)                                      | 351 (18.5)                                       | 405 (20.0)                                      | 358 (17.1)                                       |
| 6-10 years                                                       | 395 (20.5)                                      | 404 (21.2)                                       | 409 (20.2)                                      | 425 (20.3)                                       |
| 11-20 years                                                      | 413 (21.5)                                      | 406 (21.3)                                       | 467 (23.1)                                      | 514 (24.6)                                       |
| 21-39 years                                                      | 326 (17.0)                                      | 315 (16.6)                                       | 297 (14.7)                                      | 331 (15.8)                                       |
| ≥ 40 years                                                       | 433 (22.5)                                      | 426 (22.4)                                       | 444 (22.0)                                      | 463 (22.2)                                       |
| <b>Sex<sup>c</sup></b>                                           |                                                 |                                                  |                                                 |                                                  |
| Female                                                           | 1031 (53.6)                                     | 1055 (55.5)                                      | 1093 (54.1)                                     | 1124 (53.8)                                      |
| Male                                                             | 892 (46.4)                                      | 847 (44.5)                                       | 929 (45.9)                                      | 967 (46.2)                                       |
| <b>Catchment area<sup>d</sup></b>                                |                                                 |                                                  |                                                 |                                                  |
| Vea/Gowrie                                                       | 919 (47.8)                                      | 925 (46.8)                                       | 1000 (49.5)                                     | 1026 (49.1)                                      |
| Soe                                                              | 1004 (52.2)                                     | 977 (51.4)                                       | 1022 (50.5)                                     | 1065 (50.9)                                      |
| <b>LLIN usage<br/>(previous night)</b>                           |                                                 |                                                  |                                                 |                                                  |
| No                                                               | 210 (10.9)                                      | 286 (15.0)                                       | 191 (9.4)                                       | 274 (13.1)                                       |
| Yes                                                              | 1713 (89.1)                                     | 1616 (85.0)                                      | 1831 (90.6)                                     | 1817 (86.9)                                      |
| <b>Antimalarial treatment<br/>(previous 2-weeks)<sup>e</sup></b> |                                                 |                                                  |                                                 |                                                  |
| No treatment                                                     | 1127 (58.6)                                     | 1748 (91.9)                                      | 1645(81.4)                                      | 1922 (91.9)                                      |
| Treatment                                                        | 796 (41.4)                                      | 154 (8.1)                                        | 298 (14.7)                                      | 157 (7.6)                                        |
| Don't know                                                       | 0 (0)                                           | 0 (0)                                            | 79 (3.9)                                        | 12 (0.6)                                         |
| <b>Anaemia Status<sup>f</sup></b>                                |                                                 |                                                  |                                                 |                                                  |
| Anaemic                                                          | 896 (46.7)                                      | 605 (32.2)                                       | 829 (41.1)                                      | 602 (28.8)                                       |
| Non-anaemic                                                      | 1,022 (53.3)                                    | 1,275 (67.8)                                     | 1,188 (58.9)                                    | 1,487 (71.2)                                     |

<sup>a</sup> Data reflect the number (% (n/N)) of subjects.

<sup>b</sup> During each survey a similar proportion of participants were surveyed in all the age groups.

<sup>c</sup> During each survey a similar proportion of female and male participants were surveyed in each age category, except for the adult age groups (>20 years) where significantly more females than males were surveyed ( $p$ -value  $\leq 0.038$ ).

<sup>d</sup> During each survey a similar proportion of participants were surveyed in each catchment area.

<sup>e</sup> Indicates those participants who reported they were sick, sought treatment, and were provided with an antimalarial treatment in the previous two-weeks.

<sup>f</sup> Anaemia status was defined according to the WHO guidelines for age and gender. Participants in each Survey were excluded from the anaemia status category if their haemoglobin was not measured on the day the survey was conducted: Survey 1 (N = 5), Survey 2 (N = 22), Survey 3 (N = 5), and Survey 4 (N = 2).
