# Supplementary material
Source: PubMed Central journal article supplement (PMC10021420)
Supplement: pgph.0000285.s007.pdf [file pgph.0000285.s007.pdf]

S2 Table. Parasitological parameters and DBL $\alpha$  type sequencing data for the microscopic *P. falciparum* infections during each survey.

| Parasitological parameters                                                                                     | Pre-IRS                                         |                                                  | Post-IRS                                        |                                                  |
|----------------------------------------------------------------------------------------------------------------|-------------------------------------------------|--------------------------------------------------|-------------------------------------------------|--------------------------------------------------|
|                                                                                                                | Survey 1<br>End of wet season<br>(October 2012) | Survey 2<br>End of dry season<br>(May/June 2013) | Survey 3<br>End of wet season<br>(October 2015) | Survey 4<br>End of dry season<br>(May/June 2016) |
| <b>Number of participants</b> <sup>a</sup>                                                                     | 1923 (100)                                      | 1902 (100)                                       | 2022 (100)                                      | 2091 (100)                                       |
| <b>Microscopic <i>P. falciparum</i> prevalence</b> <sup>b</sup>                                                | 808 (42.0)                                      | 513 (27.0)                                       | 545 (27.0)                                      | 272 (13.0)                                       |
| <b>Age groups</b>                                                                                              |                                                 |                                                  |                                                 |                                                  |
| 1-5 years                                                                                                      | 173 (48.6)                                      | 100 (28.5)                                       | 63 (15.6)                                       | 28 (7.8)                                         |
| 6-10 years                                                                                                     | 243 (61.5)                                      | 169 (41.8)                                       | 167 (40.8)                                      | 114 (26.5)                                       |
| 11-20 years                                                                                                    | 202 (48.9)                                      | 159 (39.2)                                       | 169 (36.2)                                      | 97 (18.9)                                        |
| >20 years                                                                                                      | 190 (25.0)                                      | 85 (11.5)                                        | 146 (19.7)                                      | 33 (4.2)                                         |
| <b>Microscopic <i>P. falciparum</i> isolates with DBL<math>\alpha</math> type sequencing data</b> <sup>c</sup> | 685 (84.8)                                      | 440 (85.8)                                       | 413 (75.8)                                      | 238 (87.5)                                       |
| <b>Age groups</b>                                                                                              |                                                 |                                                  |                                                 |                                                  |
| 1-5 years                                                                                                      | 158 (91.3)                                      | 94 (94.0)                                        | 51 (81.0)                                       | 25 (89.3)                                        |
| 6-10 years                                                                                                     | 217 (89.3)                                      | 156 (92.3)                                       | 146 (87.4)                                      | 103 (90.4)                                       |
| 11-20 years                                                                                                    | 167 (82.7)                                      | 136 (85.5)                                       | 129 (76.3)                                      | 85 (87.6)                                        |
| >20 years                                                                                                      | 143 (75.3)                                      | 54 (63.5)                                        | 87 (59.6)                                       | 25 (75.8)                                        |

<sup>a</sup> Number of participants surveyed that were analysed by microscopy.

<sup>b</sup> Data reflect the number (% (n/N)) of participants sampled that were microscopically positive for *P. falciparum* (including mixed *P. falciparum* infections) relative to the number of participants surveyed in the total population or by the age groups presented.

<sup>c</sup> Data reflect the number (% (n/N)) of microscopic *P. falciparum* isolates that had DBL $\alpha$  type sequencing data relative the number of participants surveyed that were microscopically positive for *P. falciparum* (including mixed *P. falciparum* infections) in the total population or by the age groups presented. *P. falciparum* isolates that had low DNA quality and/or sequencing quality (i.e., < 20 DBL $\alpha$  types, S3 Table) were removed when the sequencing dataset was cleaned (please see the Methods for additional details).
