# Supplementary material
Source: PubMed Central journal article supplement (PMC10021420)
Supplement: pgph.0000285.s008.pdf [file pgph.0000285.s008.pdf]

S3 Table. DBL $\alpha$  type sequencing results for all isolates that were positive for a *P. falciparum* infection by microscopy.

| Survey | <i>P. falciparum</i> positive isolates sequenced | <i>P. falciparum</i> isolates with DBL $\alpha$ type sequencing data (i.e., $\geq 20$ DBL $\alpha$ types) <sup>a</sup> | <i>P. falciparum</i> isolates with no DBL $\alpha$ type sequencing data (i.e., 0 DBL $\alpha$ types) <sup>b</sup> | <i>P. falciparum</i> isolates with limited DBL $\alpha$ type sequencing data (i.e., 1 to $< 20$ DBL $\alpha$ types) <sup>c</sup> |
|--------|--------------------------------------------------|------------------------------------------------------------------------------------------------------------------------|-------------------------------------------------------------------------------------------------------------------|----------------------------------------------------------------------------------------------------------------------------------|
| 1      | 808                                              | 685 (84.8)                                                                                                             | 66 (8.2)                                                                                                          | 57 (7.0)                                                                                                                         |
| 2      | 513                                              | 440 (85.8)                                                                                                             | 45 (8.8)                                                                                                          | 28 (5.4)                                                                                                                         |
| 3      | 545                                              | 413 (75.8)                                                                                                             | 35 (6.4)                                                                                                          | 97 (17.8)                                                                                                                        |
| 4      | 272                                              | 238 (87.5)                                                                                                             | 13 (4.8)                                                                                                          | 21 (7.7)                                                                                                                         |
| TOTAL  | 2,138                                            | 1,776 (83.1)                                                                                                           | 159 (7.4)                                                                                                         | 203 (9.5)                                                                                                                        |

<sup>a</sup> Data reflect the number (% (n/N)) of *P. falciparum* isolates that had DBL $\alpha$  type sequencing data relative to the number of participants sampled that had microscopically positive for *P. falciparum* (including mixed *P. falciparum* infections).

<sup>b</sup> Data reflect the number (% (n/N)) of microscopic *P. falciparum* isolates that had no DBL $\alpha$  type sequencing data relative to the number of participants sampled that were microscopically positive for *P. falciparum* (including mixed *P. falciparum* infections).

<sup>c</sup> Data reflect the number (% (n/N)) of microscopic *P. falciparum* isolates that had between DBL $\alpha$  type sequencing data (i.e., 1 to  $< 20$  DBL $\alpha$  types) relative the number of participants sampled that were microscopically positive for *P. falciparum* (including mixed *P. falciparum* infections).
