# Supplementary material
Source: PubMed Central journal article supplement (PMC10021420)
Supplement: pgph.0000285.s009.pdf [file pgph.0000285.s009.pdf]

S4 Table. Parasitological parameters of the *P. falciparum* infections during each survey.

| Parasitological parameters                                              | Pre-IRS                                         |                                                  | Post-IRS                                        |                                                  |
|-------------------------------------------------------------------------|-------------------------------------------------|--------------------------------------------------|-------------------------------------------------|--------------------------------------------------|
|                                                                         | Survey 1<br>End of wet season<br>(October 2012) | Survey 2<br>End of dry season<br>(May/June 2013) | Survey 3<br>End of wet season<br>(October 2015) | Survey 4<br>End of dry season<br>(May/June 2016) |
| <b>Number of participants<sup>a</sup></b>                               | 1923 (100)                                      | 1902 (100)                                       | 2022 (100)                                      | 2091 (100)                                       |
| <b>Microscopic<br/><i>P. falciparum</i> prevalence<sup>b</sup></b>      |                                                 |                                                  |                                                 |                                                  |
| <b>Age groups</b>                                                       |                                                 |                                                  |                                                 |                                                  |
| All                                                                     | <b>808 (42.0)</b>                               | <b>513 (27.0)</b>                                | <b>545 (27.0)</b>                               | <b>272 (13.0)</b>                                |
| 1-5 years                                                               | 173 (48.6)                                      | 100 (28.5)                                       | 63 (15.6)                                       | 28 (7.8)                                         |
| 6-10 years                                                              | 243 (61.5)                                      | 169 (41.8)                                       | 167 (40.8)                                      | 114 (26.5)                                       |
| 11-20 years                                                             | 202 (48.9)                                      | 159 (39.2)                                       | 169 (36.2)                                      | 97 (18.9)                                        |
| 21-39 years                                                             | 84 (25.8)                                       | 38 (12.1)                                        | 52 (17.5)                                       | 12 (3.6)                                         |
| ≥ 40 years                                                              | 106 (24.5)                                      | 47 (11.0)                                        | 94 (21.2)                                       | 21 (4.5)                                         |
| <b>Sex</b>                                                              |                                                 |                                                  |                                                 |                                                  |
| Female                                                                  | 379 (36.8)                                      | 239 (22.6)                                       | 269 (24.6)                                      | 123 (10.9)                                       |
| Male                                                                    | 429 (48.1)                                      | 274 (32.3)                                       | 276 (29.7)                                      | 149 (15.4)                                       |
| <b>Catchment area</b>                                                   |                                                 |                                                  |                                                 |                                                  |
| Vea/Gowrie                                                              | 356 (38.7)                                      | 255 (27.6)                                       | 261 (26.1)                                      | 97 (9.5)                                         |
| Soe                                                                     | 452 (45.0)                                      | 258 (26.4)                                       | 284 (27.8)                                      | 175 (16.4)                                       |
| <b>Microscopic<br/><i>P. falciparum</i> density<sup>c</sup></b>         |                                                 |                                                  |                                                 |                                                  |
| <b>Age groups</b>                                                       |                                                 |                                                  |                                                 |                                                  |
| All                                                                     | <b>520 [160-1640]</b>                           | <b>160 [80-560]</b>                              | <b>320 [120-1800]</b>                           | <b>280 [120-640]</b>                             |
| 1-5 years                                                               | 1640 [400-9840]                                 | 440 [120-1270]                                   | 1840 [240-19,940]                               | 400 [80-1650]                                    |
| 6-10 years                                                              | 760 [240-1840]                                  | 240 [120-680]                                    | 520 [200-2720]                                  | 380 [160-720]                                    |
| 11-20 years                                                             | 320 [160-760]                                   | 120 [80-400]                                     | 280 [120-1000]                                  | 240 [160-480]                                    |
| 21-39 years                                                             | 200 [120-720]                                   | 120 [40-160]                                     | 200 [80-1730]                                   | 120 [80-200]                                     |
| ≥ 40 years                                                              | 200 [120-670]                                   | 80 [40-140]                                      | 120 [40-320]                                    | 120 [80-160]                                     |
| <b>Sex</b>                                                              |                                                 |                                                  |                                                 |                                                  |
| Female                                                                  | 520 [160-1620]                                  | 160 [80-460]                                     | 320 [80-1960]                                   | 280 [120-480]                                    |
| Male                                                                    | 480 [160-1640]                                  | 200 [120-600]                                    | 320 [120-1300]                                  | 320 [120-720]                                    |
| <b>Catchment area</b>                                                   |                                                 |                                                  |                                                 |                                                  |
| Vea/Gowrie                                                              | 360 [200-1200]                                  | 160 [80-520]                                     | 240 [80-1280]                                   | 280 [120-560]                                    |
| Soe                                                                     | 680 [200-2170]                                  | 200 [80-600]                                     | 400 [120-2210]                                  | 280 [120-640]                                    |
| <b>Submicroscopic<br/><i>P. falciparum</i> prevalence<sup>d,e</sup></b> | 1115 (100)                                      |                                                  | 1473 (100)                                      |                                                  |
| <b>Age groups</b>                                                       |                                                 |                                                  |                                                 |                                                  |
| All                                                                     | <b>612 (54.9)</b>                               |                                                  | <b>295 (20.0)</b>                               |                                                  |
| 1-5 years                                                               | 82 (44.8)                                       |                                                  | 36 (11.1)                                       |                                                  |
| 6-10 years                                                              | 90 (59.2)                                       |                                                  | 56 (23.1)                                       |                                                  |
| 11-20 years                                                             | 145 (68.7)                                      |                                                  | 93 (31.4)                                       |                                                  |
| 21-39 years                                                             | 128 (52.9)                                      |                                                  | 51 (20.9)                                       |                                                  |
| ≥ 40 years                                                              | 167 (51.1)                                      |                                                  | 57 (16.3)                                       |                                                  |
| <b>Sex</b>                                                              |                                                 |                                                  |                                                 |                                                  |
| Female                                                                  | 340 (52.1)                                      |                                                  | 149 (18.1)                                      |                                                  |
| Male                                                                    | 272 (58.7)                                      |                                                  | 146 (22.5)                                      |                                                  |
| <b>Catchment area</b>                                                   |                                                 |                                                  |                                                 |                                                  |
| Vea/Gowrie                                                              | 258 (45.1)                                      |                                                  | 118 (16.0)                                      |                                                  |
| Soe                                                                     | 354 (64.1)                                      |                                                  | 177 (24.0)                                      |                                                  |

<sup>a</sup> Number of participants surveyed that were analysed by microscopy.

<sup>b</sup> Data reflect the number (% (n/N)) of participants that were microscopically positive for *P. falciparum* (including mixed *P. falciparum* infections).

<sup>c</sup> Median parasite density for microscopically positive *P. falciparum* (including mixed *P. falciparum* infections) (value/ $\mu$ L, Inter Quartile Range [IQR]) samples.

<sup>d</sup> Data reflect the number (% (n/N)) of participants sampled in Survey 1 and Survey 3 that were PCR positive (i.e., submicroscopic) for *P. falciparum* (including mixed *P. falciparum* infections).

<sup>e</sup> For the submicroscopic *P. falciparum* infections in Survey 3, there were 1,473 participants included in the analysis: exclusions were participants where a dried blood spot was not available for PCR (N=4).
