# Supplementary material
Source: PubMed Central journal article supplement (PMC10021420)
Supplement: pgph.0000285.s010.pdf [file pgph.0000285.s010.pdf]

**S5 Table. Absolute decrease in the probability of having a microscopic *P. falciparum* infection post-IRS in Bongo at the end of the wet and dry seasons.** Results are expressed in terms of Attributable Risk (AR) and Attributable Risk percentage (AR%).

| Outcome                                                   | Demographic characteristics | Pre-IRS to Post-IRS<br>End of wet season<br>Survey 1 to Survey 3 |                       |                         | Pre-IRS to Post-IRS<br>End of dry season<br>Survey 2 to Survey 4 |                      |         |
|-----------------------------------------------------------|-----------------------------|------------------------------------------------------------------|-----------------------|-------------------------|------------------------------------------------------------------|----------------------|---------|
|                                                           |                             | AR<br>(95% CI)                                                   | AR%<br>(95% CI)       | p-value                 | AR<br>(95% CI)                                                   | AR%<br>(95% CI)      | p-value |
| Positive for a microscopic <i>P. falciparum</i> infection | All                         | 0.151<br>(0.121, 0.180)                                          | 36.9<br>(29.9, 41.3)  | < 0.001                 | 0.140<br>(0.115, 0.164)                                          | 51.8<br>(44.9, 57.8) | < 0.001 |
|                                                           | <b>Age Groups</b>           |                                                                  |                       |                         |                                                                  |                      |         |
|                                                           | 1-5 years                   | 0.330<br>(0.268, 0.393)                                          | 68.0<br>(58.9, 75.1)  | < 0.001                 | 0.207<br>(0.152, 0.262)                                          | 72.6<br>(59.4, 81.5) | < 0.001 |
|                                                           | 6-10 years                  | 0.207<br>(0.139, 0.275)                                          | 33.6<br>(23.6, 42.3)  | < 0.001                 | 0.150<br>(0.086-0.214)                                           | 35.9<br>(22.1, 47.2) | < 0.001 |
|                                                           | 11-20 years                 | 0.127<br>(0.062, 0.192)                                          | 26.0<br>(13.6, 36.7)  | < 0.001                 | 0.203<br>(0.145, 0.261)                                          | 51.8<br>(40.2, 61.2) | < 0.001 |
|                                                           | 21-39 years                 | 0.083<br>(0.018, 0.147)                                          | 32.1<br>(7.5, 50.1)   | 0.013                   | 0.084<br>(0.043, 0.126)                                          | 70.0<br>(43.6, 84.0) | 0.013   |
|                                                           | ≥ 40 years                  | 0.033<br>(-0.022, 0.089)                                         | 13.5<br>(-10.4, 32.3) | 0.243                   | 0.065<br>(0.030, 0.100)                                          | 58.9<br>(32.4, 75.0) | 0.243   |
|                                                           | <b>Sex</b>                  |                                                                  |                       |                         |                                                                  |                      |         |
|                                                           | Female                      | 0.122<br>(0.083, 0.161)                                          | 33.1<br>(23.6, 41.3)  | < 0.001                 | 0.117<br>(0.086, 0.148)                                          | 51.7<br>(41.0, 60.5) | < 0.001 |
|                                                           | Male                        | 0.184<br>(0.140, 0.228)                                          | 38.2<br>(30.3, 45.2)  | < 0.001                 | 0.169<br>(0.131, 0.208)                                          | 52.4<br>(43.2, 60.1) | < 0.001 |
| <b>Catchment area</b>                                     |                             |                                                                  |                       |                         |                                                                  |                      |         |
| Vea/Gowrie                                                | 0.126<br>(0.085, 0.168)     | 32.6<br>(23.1, 41.0)                                             | < 0.001               | 0.181<br>(0.147, 0.215) | 65.7<br>(57.4, 72.4)                                             | < 0.001              |         |
| Soe                                                       | 0.172<br>(0.131, 0.214)     | 38.3<br>(30.4, 45.3)                                             | < 0.001               | 0.100<br>(0.064, 0.135) | 37.8<br>(26.2, 47.6)                                             | < 0.001              |         |

AR (Attributable Risk = (Pre-IRS Risk) - (Post-IRS Risk))

AR% (Attributable Risk Percentage = ((Pre-IRS Risk) - (Post-IRS Risk)/ (Pre-IRS Risk)) \* 100%)

CI=confidence interval
