# Supplementary material
Source: PubMed Central journal article supplement (PMC10021420)
Supplement: pgph.0000285.s011.pdf [file pgph.0000285.s011.pdf]

S6 Table. Association between the IRS and microscopic *P. falciparum* infection prevalence at the end of the wet seasons.

| Factor                                           | Microscopic <i>P. falciparum</i> infection <sup>a</sup> |                 |                       |                 |
|--------------------------------------------------|---------------------------------------------------------|-----------------|-----------------------|-----------------|
|                                                  | Unadjusted                                              |                 | Adjusted <sup>b</sup> |                 |
|                                                  | OR (95% CI)                                             | <i>p</i> -value | aOR (95% CI)          | <i>p</i> -value |
| <b>IRS/Survey</b>                                |                                                         |                 |                       |                 |
| Pre-IRS (Survey 1, October 2012)                 | 1.00                                                    | -               | 1.00                  | -               |
| Post-IRS (Survey 3, October 2015)                | 0.51 (0.45-0.58)                                        | < 0.001         | 0.47 (0.40-0.54)      | < 0.001         |
| <b>Age groups</b>                                |                                                         |                 |                       |                 |
| 1-5 years                                        | 1.00                                                    | -               | 1.00                  | -               |
| 6-10 years                                       | 2.31 (1.88-2.85)                                        | < 0.001         | 2.27 (1.84-2.79)      | < 0.001         |
| 11-20 years                                      | 1.58 (1.29-1.94)                                        | < 0.001         | 1.52 (1.23-1.89)      | < 0.001         |
| 21-39 years                                      | 0.61 (0.48-0.79)                                        | < 0.001         | 0.57 (0.44-0.74)      | < 0.001         |
| ≥ 40 years                                       | 0.66 (0.52-0.82)                                        | < 0.001         | 0.63 (0.50-0.80)      | < 0.001         |
| <b>Sex</b>                                       |                                                         |                 |                       |                 |
| Female                                           | 1.00                                                    | -               | 1.00                  | -               |
| Male                                             | 1.44 (1.25-1.66)                                        | < 0.001         | 1.27 (1.10-1.47)      | 0.001           |
| <b>Catchment area</b>                            |                                                         |                 |                       |                 |
| Vea/Gowrie                                       | 1.00                                                    | -               | 1.00                  | -               |
| Soe                                              | 1.22 (1.06-1.41)                                        | 0.005           | 1.24 (1.08-1.44)      | 0.003           |
| <b>LLIN usage (previous night)</b>               |                                                         |                 |                       |                 |
| No                                               | 1.00                                                    | -               | 1.00                  | -               |
| Yes                                              | 0.76 (0.61-0.95)                                        | 0.015           | 0.79 (0.62-1.01)      | 0.058           |
| <b>Antimalarial treatment (previous 2-weeks)</b> |                                                         |                 |                       |                 |
| No treatment                                     | 1.00                                                    | -               | 1.00                  | -               |
| Treatment                                        | 1.11 (0.96-1.28)                                        | 0.174           | 0.86 (0.73-1.01)      | 0.060           |

OR=odds ratio; aOR=adjusted odds ratio; CI=confidence interval, to deal with the repeated measures the cluster sandwich variance estimator was used

<sup>a</sup> Participants were excluded from the model if their antimalarial treatment in the previous two weeks was not known: Survey 3 (N = 79).

<sup>b</sup> Age group, sex, catchment area, LLIN usage the previous night, and antimalarial treatment in the previous two weeks are adjusted for in the multivariable logistic regression model.
