# Supplementary material
Source: PubMed Central journal article supplement (PMC10021420)
Supplement: pgph.0000285.s012.pdf [file pgph.0000285.s012.pdf]

S7 Table. Association between the IRS and microscopic *P. falciparum* infection prevalence at the end of the dry seasons.

| Factor                                           | Microscopic <i>P. falciparum</i> infection <sup>a</sup> |                 |                       |                 |
|--------------------------------------------------|---------------------------------------------------------|-----------------|-----------------------|-----------------|
|                                                  | Unadjusted                                              |                 | Adjusted <sup>b</sup> |                 |
|                                                  | OR (95% CI)                                             | <i>p</i> -value | aOR (95% CI)          | <i>p</i> -value |
| <b>IRS/Survey</b>                                |                                                         |                 |                       |                 |
| Pre-IRS (Survey 2, May/June 2013)                | 1.00                                                    | -               | 1.00                  | -               |
| Post-IRS (Survey 4, May/June 2016)               | 0.41 (0.35-0.47)                                        | < 0.001         | 0.36 (0.31-0.43)      | < 0.001         |
| <b>Age groups</b>                                |                                                         |                 |                       |                 |
| 1-5 years                                        | 1.00                                                    | -               | 1.00                  | -               |
| 6-10 years                                       | 2.34 (1.85-2.96)                                        | < 0.001         | 2.42 (1.91-3.08)      | < 0.001         |
| 11-20 years                                      | 1.75 (1.37-2.23)                                        | < 0.001         | 1.86 (1.44-2.39)      | < 0.001         |
| 21-39 years                                      | 0.38 (0.27-0.54)                                        | < 0.001         | 0.37 (0.26-0.53)      | < 0.001         |
| ≥ 40 years                                       | 0.38 (0.27-0.52)                                        | < 0.001         | 0.38 (0.28-0.53)      | < 0.001         |
| <b>Sex</b>                                       |                                                         |                 |                       |                 |
| Female                                           | 1.00                                                    | -               | 1.00                  | -               |
| Male                                             | 1.53 (1.29-1.80)                                        | < 0.001         | 1.32 (1.11-1.58)      | 0.002           |
| <b>Catchment area</b>                            |                                                         |                 |                       |                 |
| Vea/Gowrie                                       | 1.00                                                    | -               | 1.00                  | -               |
| Soe                                              | 1.23 (1.04-1.45)                                        | 0.013           | 1.33 (1.12-1.59)      | 0.001           |
| <b>LLIN usage (previous night)</b>               |                                                         |                 |                       |                 |
| No                                               | 1.00                                                    | -               | 1.00                  | -               |
| Yes                                              | 0.88 (0.71-1.10)                                        | 0.264           | 1.03 (0.81-1.30)      | 0.825           |
| <b>Antimalarial treatment (previous 2 weeks)</b> |                                                         |                 |                       |                 |
| No treatment                                     | 1.00                                                    | -               | 1.00                  | -               |
| Treatment                                        | 0.56 (0.40-0.79)                                        | 0.001           | 0.53 (0.37-0.76)      | < 0.001         |

OR=odds ratio; aOR=adjusted odds ratio; CI=confidence interval, to deal with the repeated measures the cluster sandwich variance estimator was used

<sup>a</sup> Participants were excluded from the model if their antimalarial treatment in the previous two weeks was not known: Survey 4 (N = 12)

<sup>b</sup> Age group, sex, catchment area, LLIN usage the previous night, and antimalarial treatment in the previous two weeks are adjusted for in the multivariable logistic regression model.
