# Supplementary material
Source: PubMed Central journal article supplement (PMC10021420)
Supplement: pgph.0000285.s013.pdf [file pgph.0000285.s013.pdf]

S8 Table. Stratum-specific estimates for the association between the IRS and microscopic *P. falciparum* prevalence at the end of the wet seasons. The reference for all comparisons was Survey 1 (pre-IRS, October 2012).

| Factor            | Microscopic <i>P. falciparum</i> infection <sup>a</sup>   |                                                                     |                 |
|-------------------|-----------------------------------------------------------|---------------------------------------------------------------------|-----------------|
|                   | Pre-IRS<br>Survey 1<br>(October 2012)<br>aOR <sup>b</sup> | Post-IRS<br>Survey 3<br>(October 2015)<br>aOR (95% CI) <sup>b</sup> | <i>p</i> -value |
| <b>Age groups</b> |                                                           |                                                                     |                 |
| 1-5 years         | 1.00                                                      | 0.19 (0.13-0.27)                                                    | < 0.001         |
| 6-10 years        | 1.00                                                      | 0.41 (0.31-0.56)                                                    | < 0.001         |
| 11-20 years       | 1.00                                                      | 0.56 (0.42-0.73)                                                    | < 0.001         |
| 21-39 years       | 1.00                                                      | 0.63 (0.43-0.94)                                                    | 0.023           |
| ≥ 40 years        | 1.00                                                      | 0.83 (0.59-1.18)                                                    | 0.311           |

aOR=adjusted odds ratio; CI=confidence interval, to deal with the repeated measures the cluster sandwich variance estimator was used

<sup>a</sup> Participants were excluded from the model if their antimalarial treatment in the previous two weeks was not known: Survey 3 (N = 79).

<sup>b</sup> Age group, sex, catchment area, LLIN usage the previous night, and antimalarial treatment in the previous two weeks are adjusted for in the multivariable logistic regression model.
