# Supplementary material
Source: PubMed Central journal article supplement (PMC10021420)
Supplement: pgph.0000285.s014.pdf [file pgph.0000285.s014.pdf]

S9 Table. Stratum-specific estimates for the association between the IRS and microscopic *P. falciparum* infection prevalence at the end of the dry seasons. The reference for all comparisons was Survey 2 (pre-IRS, May/June 2013).

| Factor                | Microscopic <i>P. falciparum</i> infection <sup>a</sup>    |                                                                      |                 |
|-----------------------|------------------------------------------------------------|----------------------------------------------------------------------|-----------------|
|                       | Pre-IRS<br>Survey 2<br>(May/June 2013)<br>aOR <sup>b</sup> | Post-IRS<br>Survey 4<br>(May/June 2016)<br>aOR (95% CI) <sup>b</sup> | <i>p</i> -value |
| <b>Age groups</b>     |                                                            |                                                                      |                 |
| 1-5 years             | 1.00                                                       | 0.21 (0.13-0.33)                                                     | < 0.001         |
| 6-10 years            | 1.00                                                       | 0.50 (0.38-0.68)                                                     | < 0.001         |
| 11-20 years           | 1.00                                                       | 0.34 (0.25-0.46)                                                     | < 0.001         |
| 21-39 years           | 1.00                                                       | 0.25 (0.12-0.52)                                                     | < 0.001         |
| ≥ 40 years            | 1.00                                                       | 0.39 (0.23-0.65)                                                     | < 0.001         |
| <b>Catchment area</b> |                                                            |                                                                      |                 |
| Vea/Gowrie            | 1.00                                                       | 0.24 (0.19-0.31)                                                     | < 0.001         |
| Soe                   | 1.00                                                       | 0.49 (0.39-0.61)                                                     | < 0.001         |

aOR=adjusted odds ratio; CI=confidence interval, to deal with the repeated measures the cluster sandwich variance estimator was used

<sup>a</sup> Participants were excluded from the model if their antimalarial treatment in the previous two weeks was not known: Survey 4 (N = 12).

<sup>b</sup> Age group, sex, catchment area, LLIN usage the previous night, and antimalarial treatment in the previous two weeks are adjusted for in the multivariable logistic regression model.
