# Supplementary material
Source: PubMed Central journal article supplement (PMC10021420)
Supplement: pgph.0000285.s015.pdf [file pgph.0000285.s015.pdf]

S10 Table. Association between the IRS and *P. falciparum* infection (i.e., microscopic or submicroscopic) prevalence at the end of the wet seasons.

| Factor                                           | <i>P. falciparum</i> infection (i.e., microscopic or submicroscopic) <sup>a</sup> |                 |                       |                 |
|--------------------------------------------------|-----------------------------------------------------------------------------------|-----------------|-----------------------|-----------------|
|                                                  | Unadjusted                                                                        |                 | Adjusted <sup>b</sup> |                 |
|                                                  | OR (95% CI)                                                                       | <i>p</i> -value | aOR (95% CI)          | <i>p</i> -value |
| <b>IRS/Survey</b>                                |                                                                                   |                 |                       |                 |
| Pre-IRS (Survey 1, October 2012)                 | 1.00                                                                              | -               | 1.00                  | -               |
| Post-IRS (Survey 3, October 2015)                | 0.25 (0.22-0.29)                                                                  | < 0.001         | 0.22 (0.19-0.26)      | < 0.001         |
| <b>Age groups</b>                                |                                                                                   |                 |                       |                 |
| 1-5 years                                        | 1.00                                                                              | -               | 1.00                  | -               |
| 6-10 years                                       | 2.49 (2.01-3.09)                                                                  | < 0.001         | 2.69 (2.15-3.35)      | < 0.001         |
| 11-20 years                                      | 2.49 (2.02-3.06)                                                                  | < 0.001         | 2.79 (2.22-3.50)      | < 0.001         |
| 21-39 years                                      | 1.14 (0.92-1.42)                                                                  | 0.245           | 1.08 (0.85-1.37)      | 0.546           |
| ≥ 40 years                                       | 1.07 (0.87-1.30)                                                                  | 0.529           | 1.05 (0.84-1.31)      | 0.692           |
| <b>Sex</b>                                       |                                                                                   |                 |                       |                 |
| Female                                           | 1.00                                                                              | -               | 1.00                  | -               |
| Male                                             | 1.43 (1.25-1.63)                                                                  | < 0.001         | 1.37 (1.18-1.59)      | < 0.001         |
| <b>Catchment area</b>                            |                                                                                   |                 |                       |                 |
| Vea/Gowrie                                       | 1.00                                                                              | -               | 1.00                  | -               |
| Soe                                              | 1.60 (1.40-1.83)                                                                  | < 0.001         | 1.71 (1.47-1.98)      | < 0.001         |
| <b>LLIN usage (previous night)</b>               |                                                                                   |                 |                       |                 |
| No                                               | 1.00                                                                              | -               | 1.00                  | -               |
| Yes                                              | 0.72 (0.58-0.90)                                                                  | 0.004           | 0.82 (0.64-1.05)      | 0.110           |
| <b>Antimalarial treatment (previous 2 weeks)</b> |                                                                                   |                 |                       |                 |
| No treatment                                     | 1.00                                                                              | -               | 1.00                  | -               |
| Treatment                                        | 1.35 (1.17-1.56)                                                                  | < 0.001         | 0.88 (0.74-1.04)      | 0.141           |

OR=odds ratio; aOR=adjusted odds ratio; CI=confidence interval, to deal with the repeated measures the cluster sandwich variance estimator was used

<sup>a</sup> Participants were excluded from the model if their (i) antimalarial treatment in the previous two weeks was not known: Survey 3 (N = 79) and/or (ii) the participant dried blood spot was not available for PCR (N=4). Age group, sex, catchment area, LLIN usage the previous night, antimalarial treatment in the previous two weeks.

<sup>b</sup> Age group, sex, catchment area, LLIN usage the previous night, and antimalarial treatment in the previous two weeks are adjusted for in the multivariable logistic regression model.
