# Supplementary material
Source: PubMed Central journal article supplement (PMC10021420)
Supplement: pgph.0000285.s016.pdf [file pgph.0000285.s016.pdf]

**S11 Table. Absolute decrease in the probability of having a *P. falciparum* infection (i.e., microscopic or submicroscopic) post-IRS in Bongo at the end of the wet season.** Results are expressed in terms of Attributable Risk (AR) and Attributable Risk percentage (AR%).

| Outcome                                                                             | Demographic characteristics | Pre-IRS to Post-IRS<br>End of wet season<br>Survey 1 to Survey 3 |                      |         |
|-------------------------------------------------------------------------------------|-----------------------------|------------------------------------------------------------------|----------------------|---------|
|                                                                                     |                             | AR<br>(95% CI)                                                   | AR%<br>(95% CI)      | p-value |
| Positive for a <i>P. falciparum</i> infection (i.e., microscopic or submicroscopic) | <b>All</b>                  | 0.322<br>(0.293, 0.351)                                          | 43.6<br>(40.3, 46.8) | < 0.001 |
|                                                                                     | <b>Age Groups</b>           |                                                                  |                      |         |
|                                                                                     | 1-5 years                   | 0.466<br>(0.403, 0.529)                                          | 65.1<br>(58.1, 70.9) | < 0.001 |
|                                                                                     | 6-10 years                  | 0.298<br>(0.238, 0.358)                                          | 35.3<br>(28.7, 41.4) | < 0.001 |
|                                                                                     | 11-20 years                 | 0.277<br>(0.220, 0.334)                                          | 32.9<br>(26.6, 38.7) | < 0.001 |
|                                                                                     | 21-39 years                 | 0.302<br>(0.227, 0.377)                                          | 46.5<br>(36.3, 55.1) | < 0.001 |
|                                                                                     | ≥ 40 years                  | 0.290<br>(0.227, 0.354)                                          | 46.1<br>(37.4, 53.5) | < 0.001 |
|                                                                                     | <b>Sex</b>                  |                                                                  |                      |         |
|                                                                                     | Female                      | 0.315<br>(0.274, 0.355)                                          | 45.1<br>(40.2, 49.6) | < 0.001 |
|                                                                                     | Male                        | 0.330<br>(0.288, 0.372)                                          | 42.0<br>(37.3, 46.4) | < 0.001 |
|                                                                                     | <b>Catchment area</b>       |                                                                  |                      |         |
| Vea/Gowrie                                                                          | 0.288<br>(0.245)            | 43.1<br>(37.7, 48.1)                                             | < 0.001              |         |
| Soe                                                                                 | 0.351<br>(0.312, 0.391)     | 43.8<br>(39.4, 48.1)                                             | < 0.001              |         |

AR (Attributable Risk = (Pre-IRS Risk) - (Post-IRS Risk))

AR% (Attributable Risk Percentage = ((Pre-IRS Risk) - (Post-IRS Risk) / (Pre-IRS Risk)) \* 100%)

CI=confidence interval
