# Supplementary material
Source: PubMed Central journal article supplement (PMC10021420)
Supplement: pgph.0000285.s017.pdf [file pgph.0000285.s017.pdf]

**S12 Table. Stratum-specific estimates for the association between the IRS and *P. falciparum* (i.e., microscopic or submicroscopic) infection prevalence at the end of the wet seasons.** The reference for all comparisons was Survey 1 (pre-IRS, October 2012).

| Factor                | <i>P. falciparum</i> infection (i.e., microscopic or submicroscopic) <sup>a</sup> |                                                                     |                 |
|-----------------------|-----------------------------------------------------------------------------------|---------------------------------------------------------------------|-----------------|
|                       | Pre-IRS<br>Survey 1<br>(October 2012)<br>aOR <sup>b</sup>                         | Post-IRS<br>Survey 3<br>(October 2015)<br>aOR (95% CI) <sup>b</sup> | <i>p</i> -value |
| <b>Age groups</b>     |                                                                                   |                                                                     |                 |
| 1-5 years             | 1.00                                                                              | 0.14 (0.10-0.19)                                                    | < 0.001         |
| 6-10 years            | 1.00                                                                              | 0.19 (0.13-0.27)                                                    | < 0.001         |
| 11-20 years           | 1.00                                                                              | 0.22 (0.16-0.31)                                                    | < 0.001         |
| 21-39 years           | 1.00                                                                              | 0.28 (0.20-0.39)                                                    | < 0.001         |
| ≥ 40 years            | 1.00                                                                              | 0.30 (0.22-0.41)                                                    | < 0.001         |
| <b>Catchment area</b> |                                                                                   |                                                                     |                 |
| Vea/Gowrie            | 1.00                                                                              | 0.28 (0.23-0.34)                                                    | < 0.001         |
| Soe                   | 1.00                                                                              | 0.16 (0.13-0.20)                                                    | < 0.001         |

aOR=adjusted odds ratio; CI=confidence interval, to deal with the repeated measures the cluster sandwich variance estimator was used

<sup>a</sup> Participants were excluded from the model if their (i) antimalarial treatment in the previous two weeks was not known: Survey 3 (N = 79) and/or (ii) the participant dried blood spot was not available for PCR (N=4).

<sup>b</sup> Age group, sex, catchment area, LLIN usage the previous night, and antimalarial treatment in the previous two weeks are adjusted for in the multivariable logistic regression model.
