# Supplementary material
Source: PubMed Central journal article supplement (PMC10021420)
Supplement: pgph.0000285.s018.pdf [file pgph.0000285.s018.pdf]

S13 Table. The estimated number of *P. falciparum* genomes.

|                   | Estimated number of <i>P. falciparum</i> genomes <sup>a</sup> |                                                  |                                                 |                                                  |
|-------------------|---------------------------------------------------------------|--------------------------------------------------|-------------------------------------------------|--------------------------------------------------|
|                   | Pre-IRS                                                       |                                                  | Post-IRS                                        |                                                  |
|                   | Survey 1<br>End of wet season<br>(October 2012)               | Survey 2<br>End of dry season<br>(May/June 2013) | Survey 3<br>End of wet season<br>(October 2015) | Survey 4<br>End of dry season<br>(May/June 2016) |
| <b>Survey</b>     | <b>2,624</b>                                                  | <b>1,637</b>                                     | <b>1,083</b>                                    | <b>806</b>                                       |
| <b>Age groups</b> |                                                               |                                                  |                                                 |                                                  |
| 1-5 years         | 683 (26.0)                                                    | 423 (25.8)                                       | 120 (11.1)                                      | 65 (8.1)                                         |
| 6-10 years        | 961 (36.6)                                                    | 634 (38.7)                                       | 401 (37.0)                                      | 408 (50.6)                                       |
| 11-20 years       | 603 (23.0)                                                    | 448 (27.4)                                       | 355 (32.8)                                      | 279 (34.6)                                       |
| 21-39 years       | 175 (6.7)                                                     | 56 (3.4)                                         | 76 (7.0)                                        | 21 (2.6)                                         |
| ≥ 40 years        | 202 (7.7)                                                     | 76 (4.6)                                         | 131 (12.1)                                      | 33 (4.1)                                         |

<sup>a</sup>MOI<sub>div</sub> used to estimate the number of diverse *P. falciparum* genomes per isolates (see Methods for additional details). Data reflect the number (% (n/N)) of subjects.
