# Supplementary material
Source: PubMed Central journal article supplement (PMC10021420)
Supplement: pgph.0000285.s019.pdf [file pgph.0000285.s019.pdf]

## S1 Text. Structured questionnaire

# Indoor residual spraying with a non-pyrethroid insecticide reduces the reservoir of *Plasmodium falciparum* in a high-transmission area in northern Ghana

Kathryn E. Tiedje<sup>¶</sup>, Abraham R. Oduro<sup>¶</sup>, Oscar Bangre, Lucas Amenga-Etego, Samuel K Dadzie, Maxwell A Appawu, Kwadwo Frempong, Victor Asoala, Shazia Ruybal-Pésantez, Charles A. Narh, Samantha L. Deed, Dionne C. Argyropoulos, Anita Ghansah, Samuel A. Agyei, Sylvester Segbaya, Kwame Desewu, Ignatius Williams, Julie A. Simpson, Keziah Malm, Mercedes Pascual, Kwadwo A. Koram, and Karen P. Day\*

<sup>¶</sup> KET and ARO contributed equally to this work as first authors.

\* Corresponding author: Karen P. Day; karen.day@unimelb.edu.au

## S1 Text. Structured questionnaire.

### SECTION 1: PARTICIPANT DATA FORM

1. Study ID

|  |  |  |  |  |  |  |  |
|--|--|--|--|--|--|--|--|
|  |  |  |  |  |  |  |  |
|--|--|--|--|--|--|--|--|

STUDY\_ID

2. Date surveyed (DD-MM-YYYY)

|  |  |  |  |  |  |  |  |
|--|--|--|--|--|--|--|--|
|  |  |  |  |  |  |  |  |
|--|--|--|--|--|--|--|--|

DATE

3. Relationship of respondent to study participant

|                    |           |           |             |
|--------------------|-----------|-----------|-------------|
| 1. Self            | 2. Mother | 3. Father | 4. Guardian |
| 5. Other (specify) |           |           |             |

RELATION

4. Sex

|         |           |
|---------|-----------|
| 1. Male | 2. Female |
|---------|-----------|

SEX

5. Date of birth (DD-MM-YYYY)

|  |  |  |  |  |  |  |  |
|--|--|--|--|--|--|--|--|
|  |  |  |  |  |  |  |  |
|--|--|--|--|--|--|--|--|

DOB

6. Compound Name

\_\_\_\_\_

CPD\_NAM

7. Compound ID

|  |  |  |  |  |  |
|--|--|--|--|--|--|
|  |  |  |  |  |  |
|--|--|--|--|--|--|

CPD\_ID

8. Name of village

\_\_\_\_\_

VILLAGE

9. Name of Section

\_\_\_\_\_

SECTION

10. Educational level of participant

|         |         |               |            |              |
|---------|---------|---------------|------------|--------------|
| 1. None | 2. Prim | 3. JSS/Middle | 4. SSS/Voc | 5. Above SSS |
|---------|---------|---------------|------------|--------------|

EDUC

11. Occupation of participant

|                         |               |           |                  |
|-------------------------|---------------|-----------|------------------|
| 1. House wife           | 2. Farmer     | 3. Trader | 4. Student/pupil |
| 5. Public/Civil servant | 6. Unemployed |           | 8. NA            |
| 7. Other (specify)      |               |           |                  |

OCCUP

**SECTION 2: MALARIA PREVENTION**

12. What are you (your HH) doing to prevent you (your ward/child) from getting malaria? (*circle all mentioned, multiple responses allowed*)

|                      |                      |                           |
|----------------------|----------------------|---------------------------|
| 1. Bed nets          | 2. Repellents        | 3. Strong scented flowers |
| 4. Clean environment | 5. Insecticide spray | 6. Nothing                |
| 7. Other (specify)   |                      |                           |

**MAL\_P**

13. At any time in the past 12 months, has anyone come into your home to spray the interior walls against mosquitoes?

|        |       |       |
|--------|-------|-------|
| 1. Yes | 2. No | 9. DK |
|--------|-------|-------|

**SPRAY**

14. If YES, who sprayed your home?

|                       |                    |        |       |       |
|-----------------------|--------------------|--------|-------|-------|
| 1. Government Program | 2. Private Company | 3. NGO | 8. NA | 9. DK |
| 5. Other (specify)    |                    |        |       |       |

**SPRAYHOME**

15. Does your household have any bed nets that can be used while sleeping?

|        |       |
|--------|-------|
| 1. Yes | 2. No |
|--------|-------|

**OWNNET**

16. If YES, how many mosquito nets does your household have?

|         |       |
|---------|-------|
| Number: | 8. NA |
|---------|-------|

**NUMNET**

17. Has the bed net been treated with insecticide?

|        |       |       |       |
|--------|-------|-------|-------|
| 1. Yes | 2. No | 8. NA | 9. DK |
|--------|-------|-------|-------|

**TREATNET**

18. When was the bed net acquired?

|             |              |             |       |       |
|-------------|--------------|-------------|-------|-------|
| 1. <6months | 2. > 6months | 3. >2 years | 8. NA | 9. DK |
|-------------|--------------|-------------|-------|-------|

**TBNAQUIRE**

19. How was the bed net acquired?

|                      |              |        |       |       |
|----------------------|--------------|--------|-------|-------|
| 1. Free distribution | 2. Purchased | 3. ANC | 8. NA | 9. DK |
|----------------------|--------------|--------|-------|-------|

**HBNAQUIRE**

20. Did you (your ward/child) sleep under a bed net last night?

|        |       |
|--------|-------|
| 1. Yes | 2. No |
|        |       |

**SLEEPNET**

21. SECTION 1/SECTION 2 completed by

**CODES1S2**

**SECTION 3: SYMPTOMATIC SCREENING**

|                                                                     |        |       |                  |                  |
|---------------------------------------------------------------------|--------|-------|------------------|------------------|
| 22. The stud. Do you (your ward/child) have health insurance?       | 1. Yes | 2. No | <b>INSURANCE</b> |                  |
| 23. Is the health insurance still valid /working?                   | 1. Yes | 2. No | 8. NA            | <b>INSUR_V</b>   |
| 24. Have you used the health insurance this year?                   | 1. Yes | 2. No | 8. NA            | <b>INSUR_USE</b> |
| 25. Have you (your child/ward) been sick within the past two weeks? | 1. Yes | 2. No | <b>SICK</b>      |                  |

**IF THE RESPONSE TO QUESTION 25 IS NO, SKIP DIRECTLY TO SECTION 4**

26. If you (your ward/child) were sick within the **PAST TWO WEEKS**, did you have any of the following symptoms?

|                       |        |       |       |                  |
|-----------------------|--------|-------|-------|------------------|
| a. Fever              | 1. Yes | 2. No | 8. NA | <b>FEVER</b>     |
| b. Headache           | 1. Yes | 2. No | 8. NA | <b>HEADACHE</b>  |
| c. Chills             | 1. Yes | 2. No | 8. NA | <b>CHILL</b>     |
| d. Rigors             | 1. Yes | 2. No | 8. NA | <b>RIGORS</b>    |
| e. Convulsion         | 1. Yes | 2. No | 8. NA | <b>CONVULSE</b>  |
| f. Cough              | 1. Yes | 2. No | 8. NA | <b>COUGH</b>     |
| g. Ear pain/discharge | 1. Yes | 2. No | 8. NA | <b>EARPAIN</b>   |
| h. Diarrhea           | 1. Yes | 2. No | 8. NA | <b>DIARRHOEA</b> |
| i. Other (Specify)    |        |       |       | <b>OTHER</b>     |

|                                                               |        |       |       |              |
|---------------------------------------------------------------|--------|-------|-------|--------------|
| 27. Did you (your child/ward) seek treatment for the illness? | 1. Yes | 2. No | 8. NA | <b>SEEKT</b> |
|---------------------------------------------------------------|--------|-------|-------|--------------|

**IF THE RESPONSE TO QUESTION 27 IS NO, SKIP DIRECTLY TO SECTION 4**

|                                                                                                                                        |                                  |             |                                |                  |                 |
|----------------------------------------------------------------------------------------------------------------------------------------|----------------------------------|-------------|--------------------------------|------------------|-----------------|
| 28. Where did you (your child/ward) go for treatment during this illness?<br><i>(circle all mentioned, multiple responses allowed)</i> | 1. Home                          | 2. Hospital | 3. Health Centre/ Clinic       | 4. CHPs compound | <b>FACILITY</b> |
|                                                                                                                                        | 5. Traditional healer/ Herbalist |             | 6. Drug store /chemical seller | 8. NA            |                 |

|                                                                            |        |       |                |
|----------------------------------------------------------------------------|--------|-------|----------------|
| 29. Was blood taken from your (your ward/child's) finger/heel for testing? | 1. Yes | 2. No | <b>BLDTEST</b> |
|----------------------------------------------------------------------------|--------|-------|----------------|

|                                                           |        |       |       |              |
|-----------------------------------------------------------|--------|-------|-------|--------------|
| 30. Were you (your ward/child) given a malaria treatment? | 1. Yes | 2. No | 9. DK | <b>MAL_T</b> |
|-----------------------------------------------------------|--------|-------|-------|--------------|

31. If YES to malaria treatment, what antimalarial treatment were you (your child/ward) given?

|            |       |        |           |       |
|------------|-------|--------|-----------|-------|
| 1. ASAQ    | 2. AL | 3. DHP | 4. SP     | 5. CQ |
| 6. Quinine | 7. AS | 10. AQ | 11. Other |       |
| 9. DK      | 8. NA |        |           |       |

**ANTIMAL**

32. SECTION 3 completed by

|  |  |
|--|--|
|  |  |
|--|--|

**CODES3**

**SECTION 4: PHYSICAL EXAMINATION**

33. Auxiliary Temperature (°C):

|  |  |   |  |
|--|--|---|--|
|  |  | • |  |
|--|--|---|--|

**TEMP**

34. Weight (kg):

|  |  |   |  |
|--|--|---|--|
|  |  | • |  |
|--|--|---|--|

**WEIGHT**

35. Systolic blood pressure (mmHg):

|  |  |  |
|--|--|--|
|  |  |  |
|--|--|--|

**SBP**

36. Diastolic blood pressure (mmHg):

|  |  |  |
|--|--|--|
|  |  |  |
|--|--|--|

**DBP**

37. SECTION 4 completed by

|  |  |
|--|--|
|  |  |
|--|--|

**CODES4**

**SECTION 5: SPECIMENS COLLECTED AT ENROLMENT**

|     | SPECIMEN                |        |       |               |
|-----|-------------------------|--------|-------|---------------|
| 38. | Filter paper blood blot | 1. Yes | 2. No | <b>BBLOT</b>  |
| 39. | Blood smear             | 1. Yes | 2. No | <b>BSMEAR</b> |

**LABORATORY RESULTS**

40. Haemoglobin concentration (g/dl)

|  |  |   |  |
|--|--|---|--|
|  |  | • |  |
|--|--|---|--|

**Hgb**

41. Rapid Malaria Test (RDT)

|             |             |             |
|-------------|-------------|-------------|
| 1. Positive | 2. Negative | 3. Not done |
|-------------|-------------|-------------|

**RAMAT**

42. SECTION 5 completed by

|  |  |
|--|--|
|  |  |
|--|--|

**CODES5**
